# Supplementary material
Source: PubMed Central journal article supplement (PMC2775081)
Supplement: NIHMS152678-supplement-Suppelementary_Material.pdf [file NIHMS152678-supplement-Suppelementary_Material.pdf]

## Supplementary Material

### Overview of Free Energy Surfaces and Transition State Geometries for the Hydrolysis of a Series of dGTP Analogues Modified at the $\beta,\gamma$ -Bridging Position

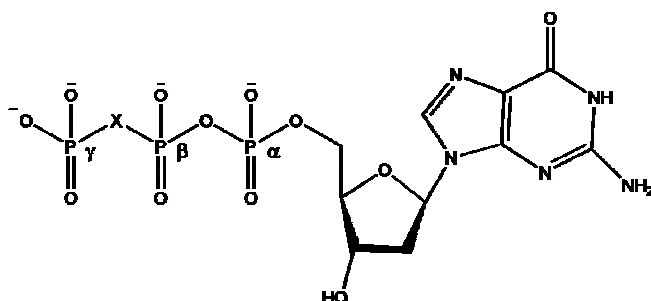

**Figure S1:** Structure of dGTP and  $\beta,\gamma$ -substituted analogues. X=CF<sub>2</sub>, CFC1, CCl<sub>2</sub>, O, CHF, CBr<sub>2</sub>, CHCl, CHBr and CH<sub>2</sub><sup>12,16</sup>.

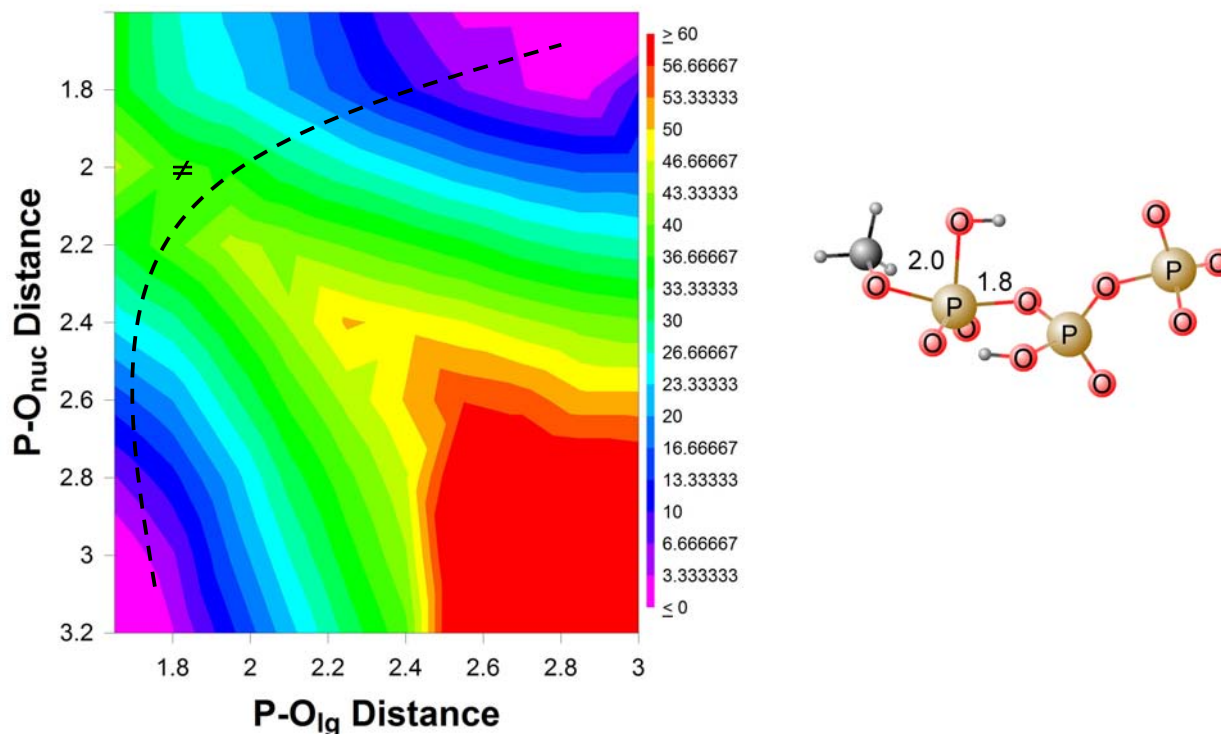

**Figure S2:** Free energy surface and transition state geometry for the dGTP analog where X=O. All distances are in Å, and ‡ denotes a transition state.

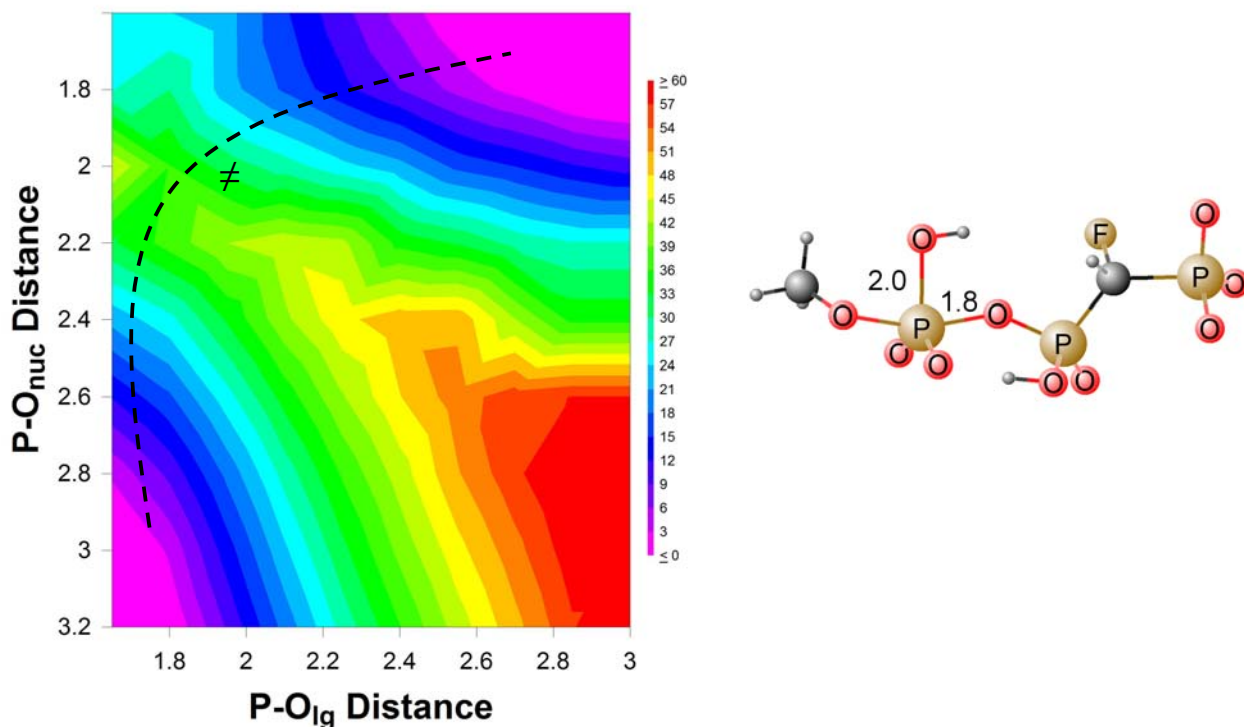

**Figure S3:** Free energy surface and transition state geometry for the dGTP analog where X=CHF. All distances are in Å, and ≠ denotes a transition state.

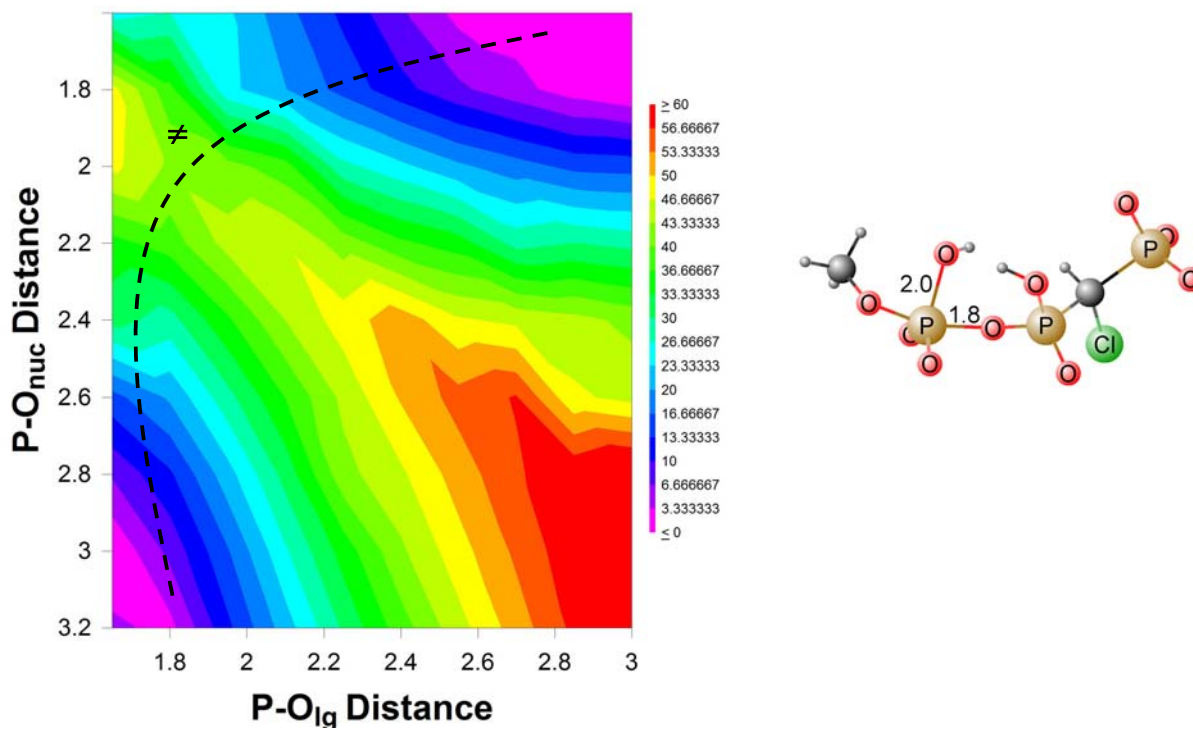

**Figure S4:** Free energy surface and transition state geometry for the dGTP analog where X=CHCl. All distances are in Å, and ≠ denotes a transition state.

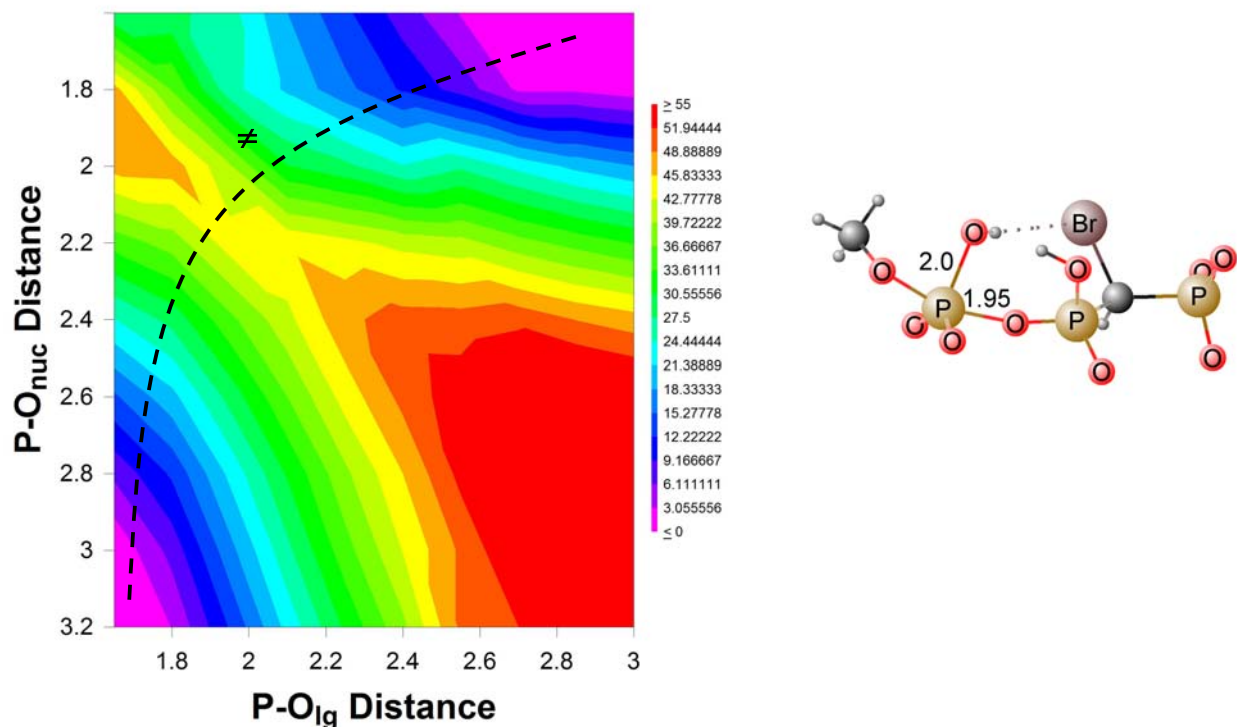

Figure S5: Free energy surface and transition state geometry for the dGTP analog where X=CHBr. All distances are in Å, and ≠ denotes a transition state.

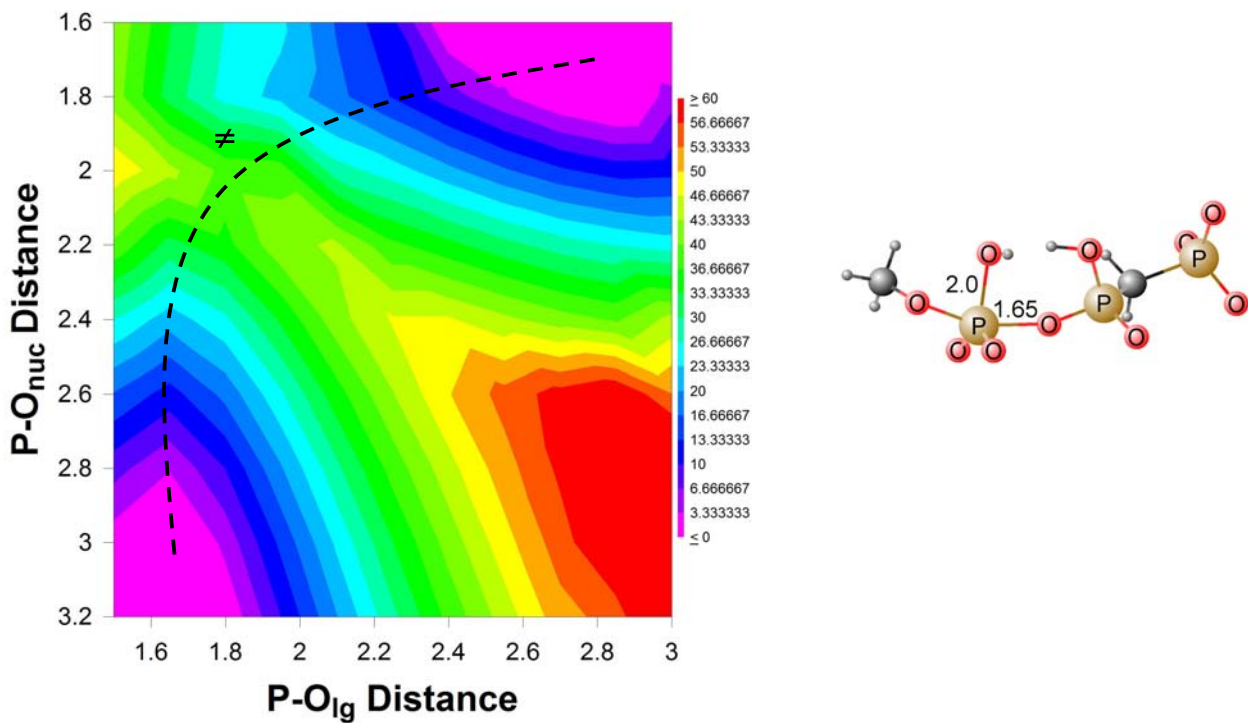

Figure S6: Free energy surface and transition state geometry for the dGTP analog where X=CH<sub>2</sub>. All distances are in Å, and ≠ denotes a transition state.

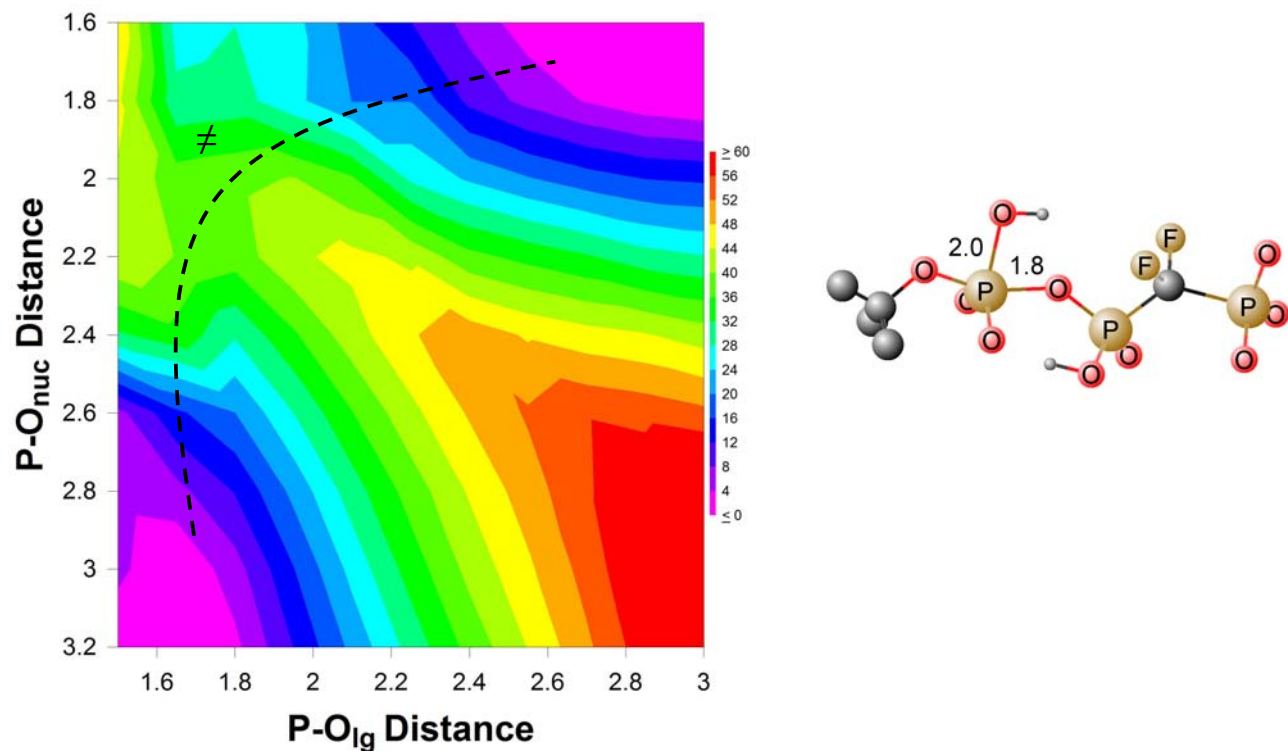

**Figure S7:** Free energy surface and transition state geometry for the dGTP analog where X=CF<sub>2</sub>. All distances are in Å, and ≠ denotes a transition state.

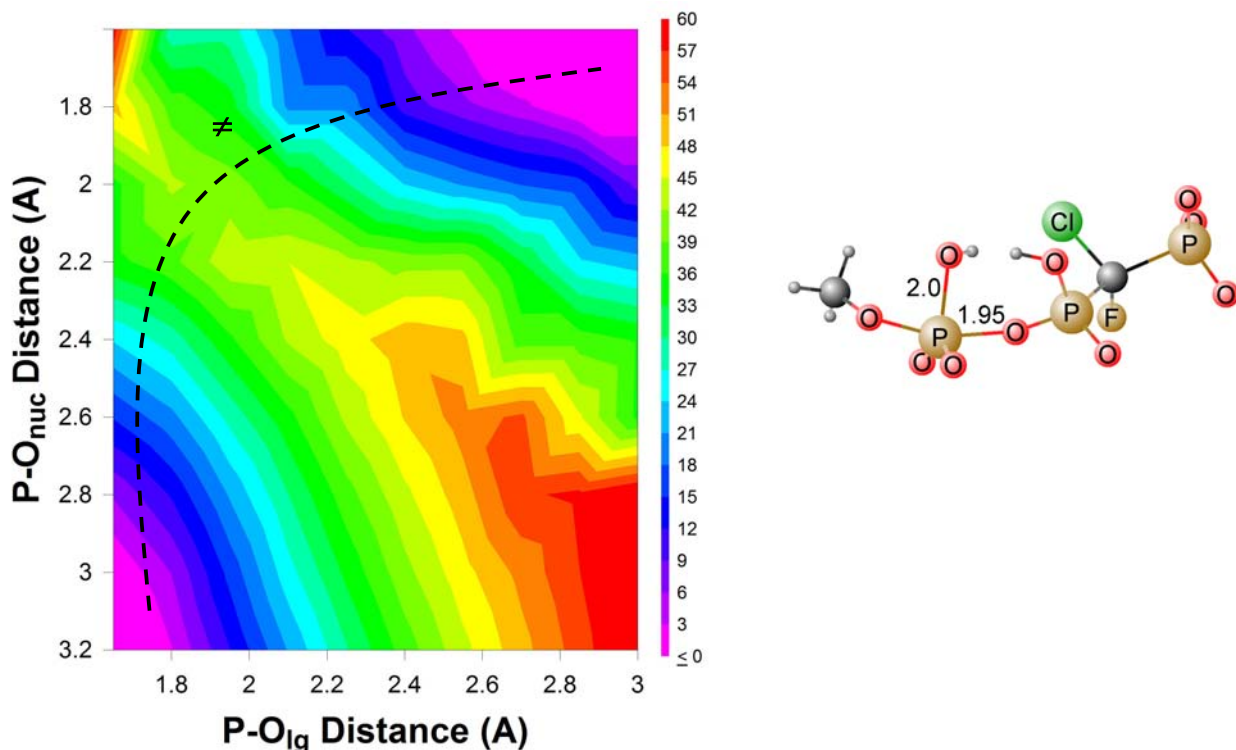

**Figure S8:** Free energy surface and transition state geometry for the dGTP analog where X=CFC1. All distances are in Å, and ≠ denotes a transition state.

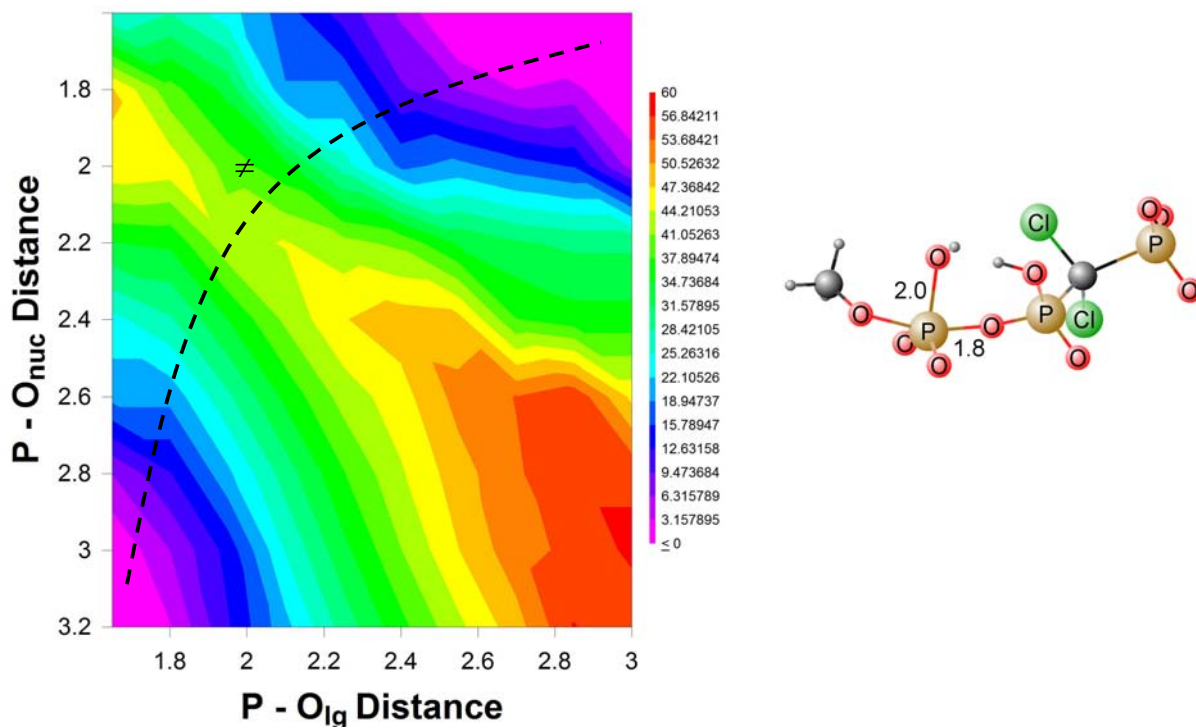

**Figure S9:** Free energy surface and transition state geometry for the dGTP analog where  $X = \text{CCl}_2$ . All distances are in Å, and  $\ddagger$  denotes a transition state.

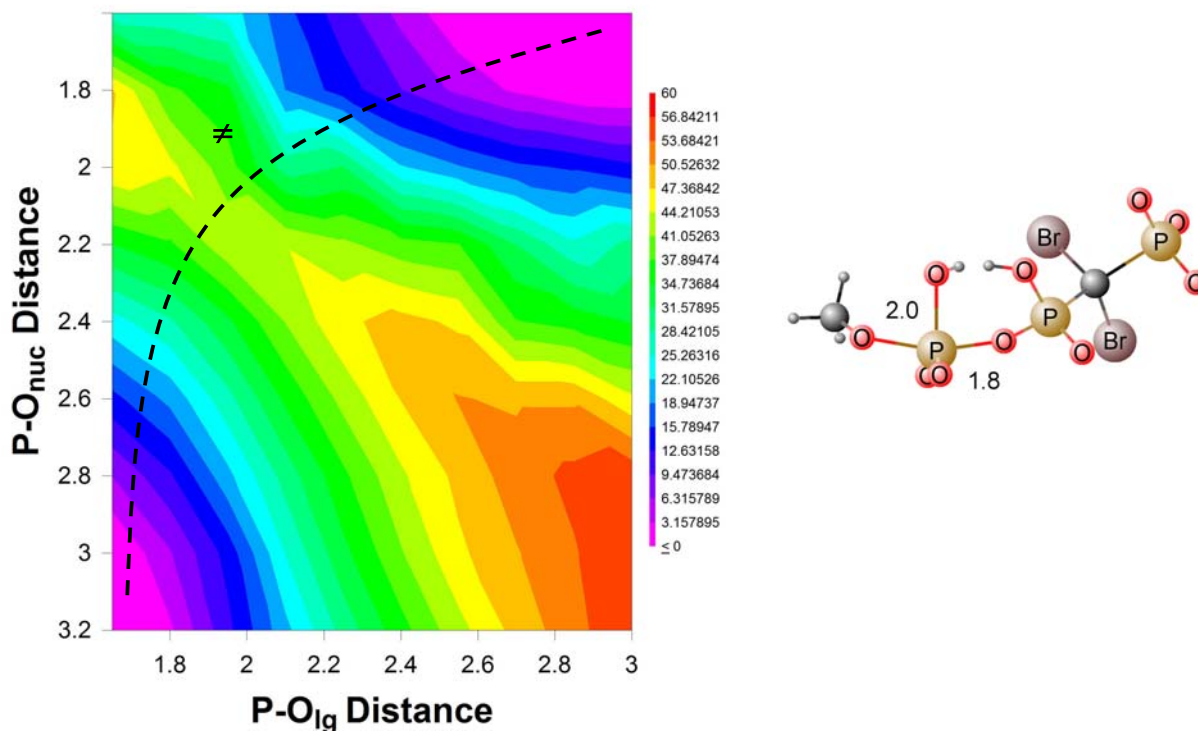

**Figure S10:** Free energy surface and transition state geometry for the dGTP analog where  $X = \text{CBr}_2$ . All distances are in Å, and  $\ddagger$  denotes a transition state.
